# Supplementary material for: A role for IL-33–activated ILC2s in eosinophilic vasculitis
Source: PubMed Central journal article supplement (PMC8262498; doi:10.1172/jci.insight.143366), 2021-06-22
Supplement: jciinsight-6-143366-s058.pdf [file jciinsight-6-143366-s058.pdf]

## Supplemental Materials

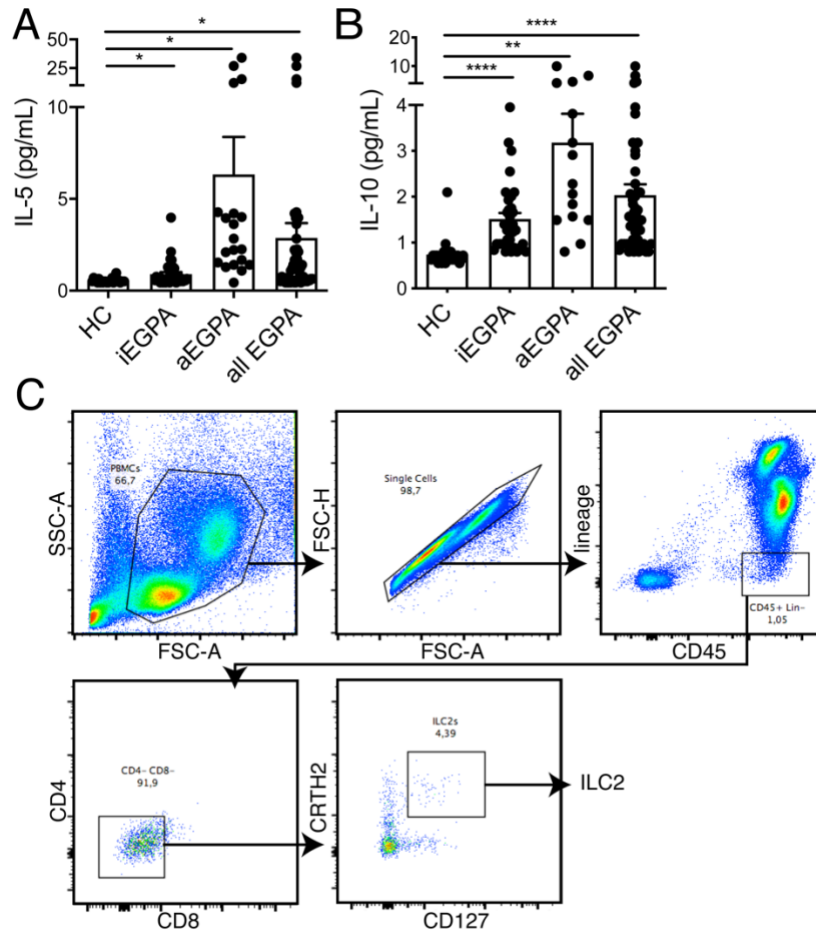

Supplemental Figure 1: Human patients with EGPA have evidence of type 2 inflammation.

**(A)** Serum IL-5 and **(B)** IL-10 from healthy controls (HC) or EGPA patients with inactive (iEGPA) or active (aEGPA) disease. n=20-53 per group. \*\*\*\*p<0.0001; \*\*\*p<0.001; \*\*p<0.01; \*p<0.05; ns = non-significant by Brown-Forsythe and Welch ANOVA with Dunnett post-hoc testing. p=0.06 and 0.08 for IL-5 and IL-10, respectively, for the difference between active and inactive disease.

**(C)** Representative flow cytometry gating strategy for ILC2s in human patients.

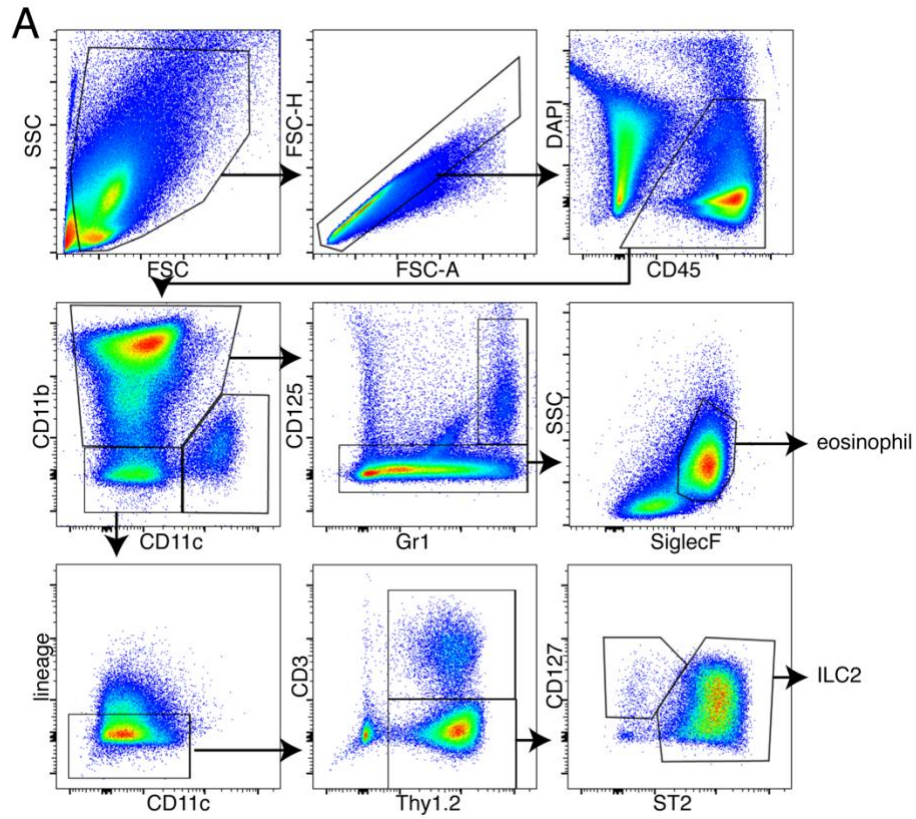

Supplemental Figure 2: Gating strategy for ILC2s.

**(A)** Representative flow cytometry gating strategy for eosinophils and ILC2s in mice.

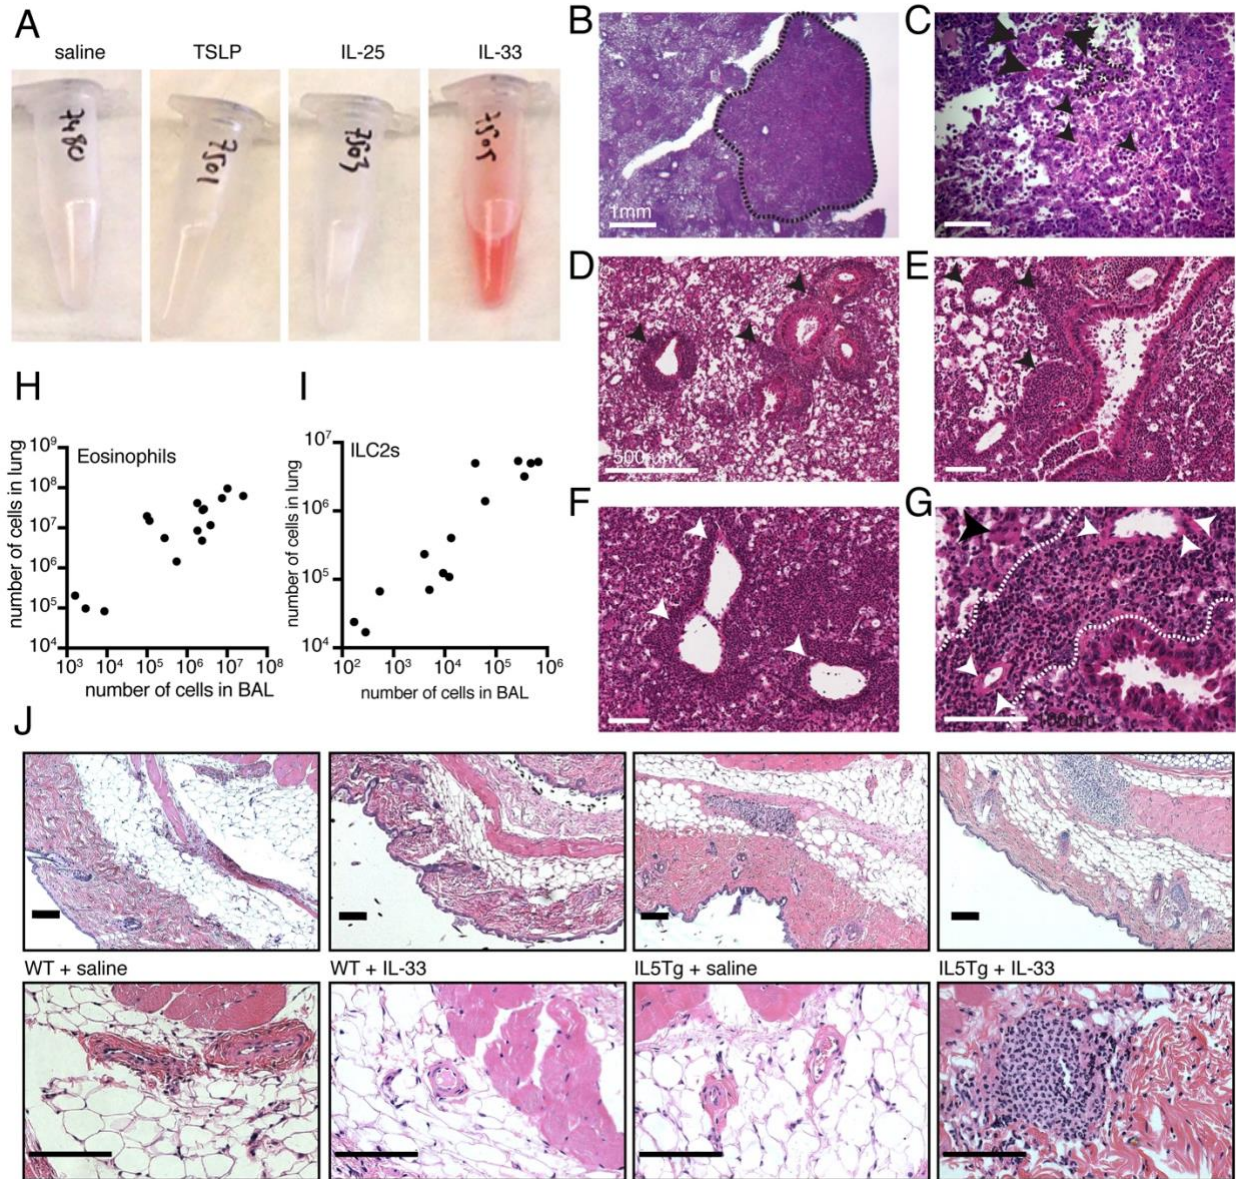

Supplemental Figure 3: IL-33 induces vasculitis in hypereosinophilic mice.

**(A)** Representative BAL from saline-, TSLP-, IL-25, or IL-33-treated IL5Tg mice. Lungs of IL-33-treated IL5Tg mice at various magnification showing **(B)** hemorrhage and diffuse alveolar filling **(C)** giant cells (arrowheads), alveolar wall infiltration (dotted outlines) and hemorrhage (arrows) **(D-E)** peribronchial and perivascular clusters **(F-G)** eosinophilic infiltrates (dotted lines), eosinophil invasion of the vessel walls (white arrowheads), and giant cells (black arrowhead).

Scale bars represent 100  $\mu\text{m}$  unless otherwise specified. **(H)** Correlation between numbers of eosinophils among saline- or IL-33-treated WT or IL5Tg mice. n=16 mice. Pearson  $r = 0.8718$  for correlation between log values. **(I)** Numbers of ILC2s in lung and BAL among saline- or IL-33-treated WT or IL5Tg+ mice. n=14 mice. Pearson  $r = 0.9354$  for correlation between log values. **(J)** H&E staining of skin samples from IL-33-treated WT or IL5Tg mice. Representative of  $\geq 3$  mice/group. 10x (top row) or 40x (bottom row) magnification. Scale bars represent 100  $\mu\text{m}$ .

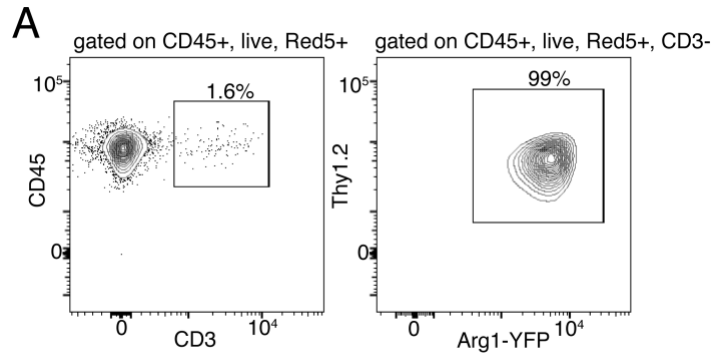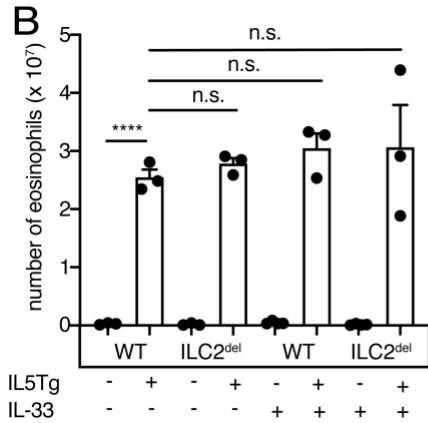

Supplemental Figure 4: ILC2s are the major source of IL-5 that are deleted in ILC2<sup>del</sup> mice.

**(A)** Representative flow cytometry plots of total CD45<sup>+</sup> Red5<sup>+</sup> cells demonstrated that even after IL-33 treatment, only ~1-2% of IL-5<sup>+</sup> (Red5<sup>+</sup>) cells were CD3<sup>+</sup>, and the remaining Red5<sup>+</sup> cells were Thy1.2<sup>+</sup>, Arg1<sup>YFP</sup><sup>+</sup> ILC2s. **(B)** Peripheral blood eosinophils are equivalently elevated in IL5Tg mice on ILC2<sup>del</sup> and WT backgrounds. Error bars indicate SEM. \*\*\*\*p<0.0001 by 1-way ANOVA with Sidak post-hoc testing. n=3-4 per group.

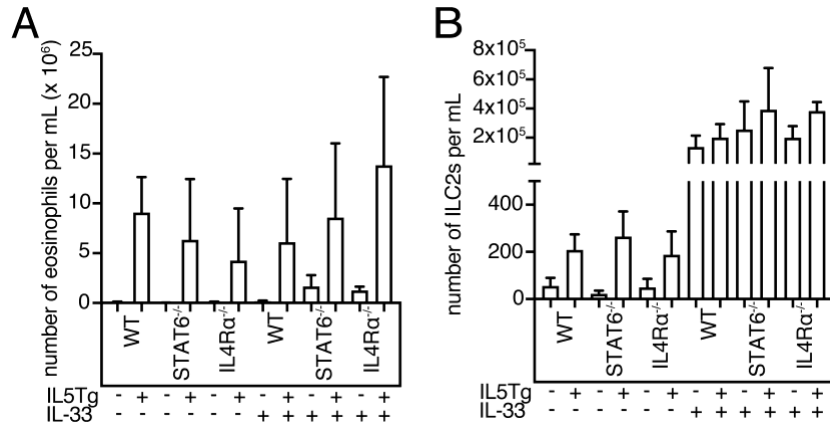

Supplemental Figure 5: Loss of IL-13 signaling protects from eosinophilia and alveolar hemorrhage without altering total peripheral eosinophils or ILC2s.

**(A)** Peripheral blood hypereosinophilia is present in all IL5Tg mice and unaffected by STAT6<sup>-/-</sup> or IL4Rα<sup>-/-</sup>. n= 2-4 mice/ group. **(B)** IL-33 induces blood ILC2s equally in WT, STAT6<sup>-/-</sup> and IL4Rα<sup>-/-</sup>. n= 2-4 mice/group.

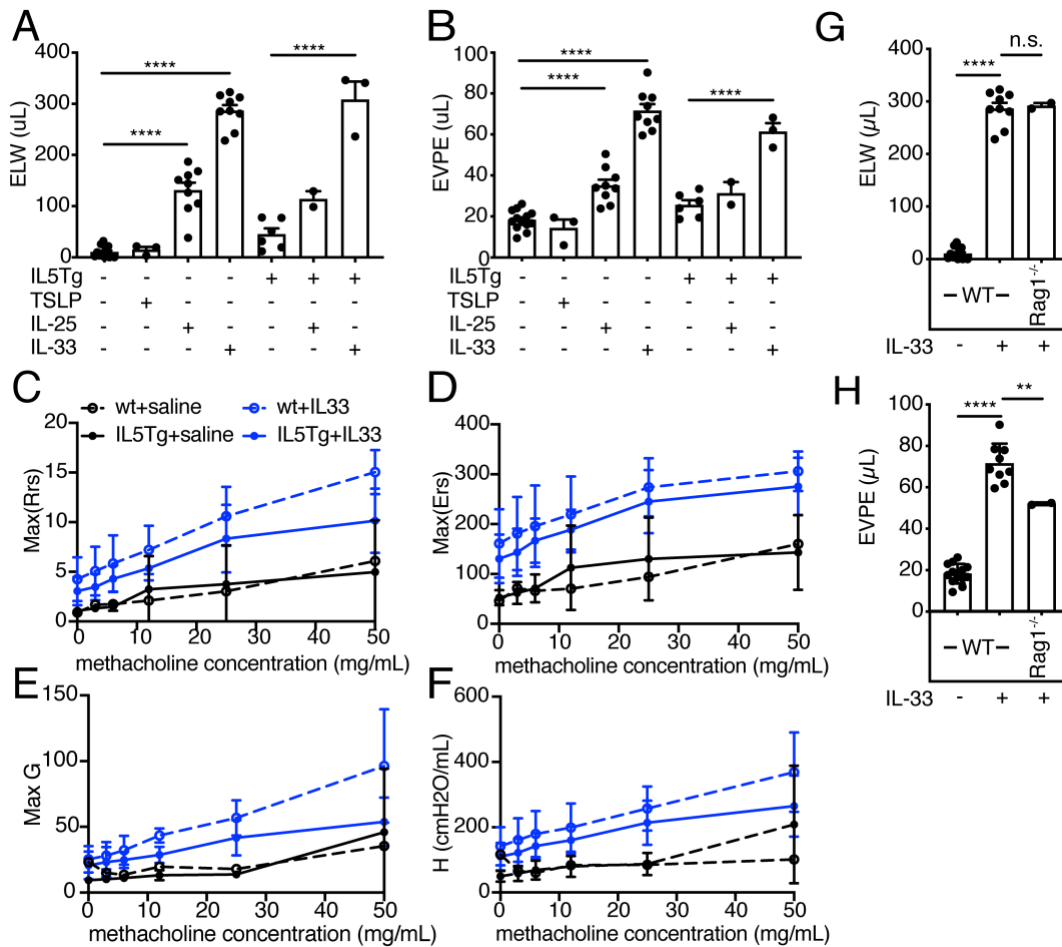

Supplemental Figure 6: IL-33 induces inflammatory pulmonary edema not seen with other alarmins, but does not result in bronchoreactivity.

**(A)** Excess/extravascular lung water in saline-, TSLP-, IL-25- or IL-33-treated WT or IL5Tg+ mice. Error bars indicate SEM. \*\*\*\*p < 0.0001 by 1-way ANOVA with Sidak post-hoc testing. n=3-13 per group. **(B)** Extravascular pulmonary equivalents (EVPE) measured from saline-, TSLP-, IL-25- or IL-33-treated WT or IL5Tg+ mice. Error bars indicate SEM. \*\*\*\*p < 0.0001 by 1-way ANOVA with Sidak post-hoc testing. n=3-13 per group. **(C-F)** Respiratory system resistance (“Rrs”), respiratory system elastance (“Ers”), tissue damping (“G”), and tissue elastance (“H”), respectively, of saline- or IL-33-treated WT or IL5Tg mice during methacholine challenge. n=6-8 per group. **(G)** Excess/extravascular lung water or **(H)** extravascular pulmonary equivalents

measured from saline- or IL-33-treated WT or Rag1<sup>-/-</sup> mice. n=2-13 per group. \*\*\*\*p<0.0001;  
\*\*\*p<0.001; \*\*p<0.01; \*p<0.05; ns = non-significant by ANOVA with Dunnett post-hoc testing.



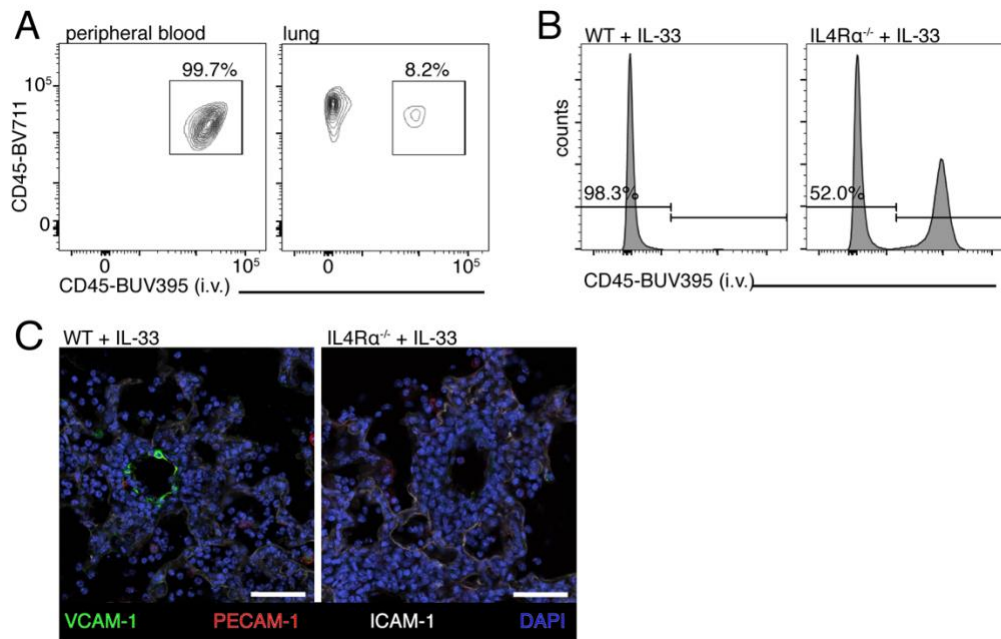

Supplemental Figure 7: Intravenous labelling demonstrates that IL4R $\alpha$  signaling is required for eosinophils to enter lung parenchyma after IL-33 treatment.

**(A)** Representative flow cytometry plots of peripheral blood (left panel) and lung (right panel) total CD45<sup>+</sup> cells (CD45-BV711) from the same IL-33-treated WT mouse. In blood, nearly 100% of peripheral blood CD45<sup>+</sup> cells were labelled after i.v. injection of anti-CD45-BUV395 antibody, whereas the majority of CD45<sup>+</sup> lung cells were not labelled by i.v. injection, reflecting extravascular positioning. **(B)** Representative histograms of intravascularly labelled (CD45-BUV395<sup>+</sup>) and extravascular/unlabelled (CD45-BUV395<sup>-</sup>) eosinophils in IL-33-treated IL4R $\alpha$ <sup>-/-</sup> or WT mice. Pre-gated on single, live, CD45<sup>+</sup>, CD11b<sup>+</sup>, CD125<sup>-</sup>, SiglecF<sup>+</sup>, SSC-hi cells. **(C)** Representative images from WT (left panel) or IL4R $\alpha$ <sup>-/-</sup> (right panel) mice treated with IL-33. VCAM-1 is stained in green, PECAM-1 in red, ICAM-1 in white, nuclei (DAPI) in blue. Scale bars represent 50  $\mu$ m.

Supplemental Table 1: antibodies used

| Antigen                            | Clone    | vendor                   | Catalog #       |
|------------------------------------|----------|--------------------------|-----------------|
| Analysis of mouse cells/tissues    |          |                          |                 |
| <b>Anti-Mouse FACS antibodies</b>  |          |                          |                 |
| Anti-mouse CD45 BUV395             | 30-F11   | BD                       | Cat# 565967     |
| Anti-mouse CD45 BV 711             | 30-F11   | BioLegend                | Cat# 103147     |
| Anti-mouse CD125 PE                | T21      | BD Biosciences           | Cat# 558488     |
| Anti-mouse SiglecF PerCP-Cy™5.5    | E50-2440 | BD Biosciences           | Cat# 565526     |
| Anti-mouse CD11b BV650             | M1/70    | BioLegend                | Cat# 101239     |
| Anti-mouse CD11c BV785             | N418     | BioLegend                | Cat# 117335     |
| Anti-mouse CD127 APC-eFluor® 780   | A7R34    | eBioscience/ThermoFisher | Cat# 47-1271-82 |
| Anti-mouse Gr-1 APC                | RB6-8C5  | BioLegend                | Cat# 108412     |
| Anti-mouse ST2 PE                  | DJ8      | MD Biosciences           | Cat# 101001PE   |
| Anti-mouse ST2 Biotin              | DJ8      | MD Biosciences           | Cat# 101001B    |
| Anti-mouse CD3 PE-Cy7              | 17A2     | BioLegend                | Cat# 100220     |
| Anti-mouse CD3 APC-Cy7             | 17A2     | BioLegend                | Cat# 100222     |
| Anti-mouse CD3 BV711               | 17A2     | BioLegend                | Cat# 100241     |
| Anti-mouse Thy1.2 BV605            | 53-2.1   | BioLegend                | Cat# 140317     |
| Anti-mouse Thy1.2 BV785            | 30-H12   | BioLegend                | Cat# 105331     |
| Anti-mouse CD4 PerCP               | RM4-5    | eBioscience/ThermoFisher | Cat# 45-0042-82 |
| Anti-human/mouse GATA3 AF488       | TWAJ     | eBioscience/ThermoFisher | Cat# 53-9966-42 |
| Anti-mouse Foxp3 PE                | FJK-16s  | eBioscience/ThermoFisher | Cat# 12-5773-82 |
| Anti-mouse Tbet PE-Cy7             | 4B10     | eBioscience/ThermoFisher | Cat# 25-5825-80 |
| <b>Anti-Mouse Lineage cocktail</b> |          |                          |                 |
| Anti-mouse CD8 $\alpha$ PB         | 53-6.7   | BioLegend                | Cat# 100725     |
| Anti-mouse CD49b PB                | DX5      | BioLegend                | Cat# 108918     |
| Anti-mouse NK-1.1 PB               | PK136    | BioLegend                | Cat# 108722     |

|                                    |           |                 |                |
|------------------------------------|-----------|-----------------|----------------|
| Anti-mouse Gr-1 PB                 | RB6-8C5   | BioLegend       | Cat# 108430    |
| Anti-mouse TER-119 PB              | TER-119   | BioLegend       | Cat# 116232    |
| Anti-mouse FcεR1a PB               | MAR-1     | BioLegend       | Cat# 134314    |
| Anti-mouse CD3 PB                  | 17A2      | BioLegend       | Cat# 100214    |
| Anti-mouse CD19 PB                 | 6D5       | BioLegend       | Cat# 115523    |
| Anti-mouse CD11c PB                | N418      | BioLegend       | Cat# 117322    |
| Anti-mouse/human CD11b PB          | M1/70     | BioLegend       | Cat# 101224    |
| Anti-mouse CD4 PB                  | RM4-5     | BioLegend       | Cat# 100428    |
| Anti-mouse F4/80 PB                | BM8       | BioLegend       | Cat# 123124    |
| <b>Anti-human FACS antibodies</b>  |           |                 |                |
| Anti-human CD4 APC                 | RPA-T4    | eBioscience     | Cat# 17-0049   |
| <b>Immunofluorescence</b>          |           |                 |                |
| Anti-mouse VCAM-1 AF488            | 421       | BioLegend       | Cat# 105701    |
| Anti-mouse CD31 (PECAM1)           | MEC 13.3  | BD Biosciences  | Cat# 553370    |
| Anti-mouse ICAM-1 AF647            | YN1/1.7.4 | BioLegend       | Cat# 116113    |
| Goat anti-rat IgG AF555            |           | Invitrogen      | Cat# A21434    |
| Analysis of human cells/tissues    |           |                 |                |
| <b>Anti-Human FACS antibodies</b>  |           |                 |                |
| Anti-human CD45 APC                | HI30      | Ozyme/BioLegend | Cat# BLE304012 |
| Anti-human CD127/IL7-RA PE         | A019D5    | Ozyme/BioLegend | Cat# BLE351304 |
| Anti-human CD294 BV421             | BM16      | Ozyme/BioLegend | Cat# BLE350112 |
| Anti-human CD8α PerCP-Cy™5.5       | SK1       | Ozyme/BioLegend | Cat# BLE344710 |
| Anti-human CD4 BV605               | RPA-T4    | Ozyme/BioLegend | Cat# BLE300556 |
| <b>Anti-Human Lineage cocktail</b> |           |                 |                |
| Anti-human CD3 FITC                | HIT3a     | Ozyme/BioLegend | Cat# BLE300306 |
| Anti-human CD11c FITC              | 3.9       | Ozyme/BioLegend | Cat# BLE301604 |
| Anti-human CD14 FITC               | M5E2      | Ozyme/BioLegend | Cat# BLE301804 |

|                                          |                   |                   |                |
|------------------------------------------|-------------------|-------------------|----------------|
| Anti-human CD19 FITC                     | HIB19             | Ozyme/BioLegend   | Cat# BLE302206 |
| Anti-human CD20 FITC                     | 2H7               | Ozyme/BioLegend   | Cat# BLE302304 |
| Anti-human CD56 FITC                     | HCD56             | Ozyme/BioLegend   | Cat# BLE318304 |
| Anti-human CD123 FITC                    | 6H6               | Ozyme/BioLegend   | Cat# BLE306014 |
| Anti-human FcεR1 AF488                   | AER-37<br>(CRA-1) | Ozyme/BioLegend   | Cat# BLE334640 |
| <b>Anti-human ELISA</b>                  |                   |                   |                |
| Human Th1/Th2/Th17 Magnetic 8-Plex Panel |                   | Life Technologies | LHC0015M       |
| IL-17E/IL-25                             |                   | Peprotech         | 900-M234       |
| sST2                                     |                   | R&D               | DST200         |
| TSLP                                     |                   | eBioscience       | 88-7497-86     |
